# Supplementary material
Source: publisher figshare collection journal article supplement (https://acs.figshare.com/ndownloader/files/3926998)
Supplement: Supplementary file 1 [file 3926998]

## SUPPORTING INFORMATION

### **Multiblock Copolymers by Thiol Addition Across Norbornene**

*Catherine N. Walker<sup>#</sup>, Joel M. Sarapas<sup>#</sup>, Vanessa Kung, Ashley L. Hall, Gregory N. Tew\**

Department of Polymer Science and Engineering, University of Massachusetts, Amherst, MA  
01003, USA

\* Corresponding author: Fax: +1-413-545-0082; e-mail: [tew@mail.pse.umass.edu](mailto:tew@mail.pse.umass.edu)

<sup>#</sup> These authors contributed equally

## ***Experimental***

### **Materials and Instruments**

Dihydroxyl-terminated poly(ethylene oxide) (PEO) ( $M_n = 4.6$  kDa,  $\bar{D} = 1.03$ ), dihydroxyl-terminated polydimethylsiloxane (PDMS) ( $M_n = 4.5$  kDa,  $\bar{D} = 1.72$ ), dihydroxyl-terminated polystyrene (PS) ( $M_n = 4.8$  kDa,  $\bar{D} = 1.14$ ), dithiol-terminated PEO ( $M_n = 4.5$  kDa,  $\bar{D} = 1.04$ ), 5-norbornene-2-carboxylic acid (99% *exo*) (NB), triphenyl phosphine ( $\text{PPh}_3$ ), diisopropyl azodicarboxylate (DIAD), 1,8-octanedithiol (ODT), 2-hydroxy-4'-(2-hydroxyethoxy)-2-methylpropiophenone (PI), tetrahydrofuran (THF), dichloromethane (DCM), and methanol (MeOH) were purchased from Alfa Aesar, Sigma Aldrich, Acros Organics, Gelest, Polymer Source or Laysan Bio and used without further purification unless otherwise stated.

$^1\text{H}$  NMR spectra were recorded at 300 MHz, using a Bruker DPX-300 NMR spectrometer. Chemical shifts ( $\delta$ ) are reported in ppm and coupling constants (J) in Hz. Gel permeation chromatography (GPC) was performed using Agilent 1260 series system with a PL gel 5  $\mu\text{m}$  guard column, two 5  $\mu\text{m}$  analytical Mixed C columns and a 5  $\mu\text{m}$  analytical Mixed D column (Agilent), incubated to 40 °C. THF was used as the eluent at a flow rate of 1.0 mL/min. Polystyrene standards were used for the calibration and toluene was used for the flow marker. Thermogravimetric analysis (TGA) measurements were taken using a TA Instruments TGA Q500 with a heating rate of 10 °C/min up to 600 °C under nitrogen. Differential Scanning Calorimetry (DSC) measurements were taken using a TA Instruments DSC Q200 (two cycles). Samples were analyzed using a heating rate of 10 °C/min under a flow of nitrogen (50 mL/min). Atomic force microscope (AFM) images were obtained with a Veeco Dimension 3100 Scanning Probe Microscope in the tapping mode with silicon tips. SAXS samples were mounted between two Kapton® films. SAXS patterns were obtained from an Osmic MaxFlux Cu  $K\alpha$  X-ray source

with a wavelength of 1.54 Angstroms and a two-dimensional gas-filled wire array detector (both Molecular Metrology, Inc.) at a distance of 1.476 m from the sample. The raw data were calibrated against the peak position of a silver behenate standard, which has a scattering vector of  $q = 1.076 \text{ 1/nm}$ . Two-dimensional images were reduced to the one-dimensional form using angular integration. Domain spacings were calculated from the principal scattering maxima ( $q^*$ ) with  $d = 2\pi/q^*$ .

### Functionalization of Precursor Polymers

PEO and PDMS precursors were prepared by previously described methods.<sup>1</sup> To prepare the polystyrene precursor,  $\alpha,\omega$ -dihydroxy terminated PS (4.0 g, 0.833 mmol), NBCOOH (0.345 g, 2.5 mmol) and  $\text{PPh}_3$  (0.656 g, 2.5 mmol) were dissolved in THF (35 mL), which had been pre-dried over calcium hydride, distilled from sodium and benzophenone, equilibrated in an ice bath and purged with  $\text{N}_2$ . DIAD (0.506 g, 2.5 mmol) was dissolved in dry THF (5 mL) and equilibrated in an ice bath, and purged with  $\text{N}_2$ . The DIAD solution was added drop wise to the stirring polymer solution under  $\text{N}_2$  flow. After the addition, the  $\text{N}_2$  line was removed and the solution was allowed to slowly warm up to room temperature as it stirred overnight. The product was precipitated three times into MeOH and collected by filtration at 87% yield. Figure S1 represents the NMR of the resulting product in  $\text{CDCl}_3$ . The reaction gave 91% conversion by comparing the alkene peaks at 6.09 ppm to the methylene groups next to the ether linkage at 3.74 ppm.

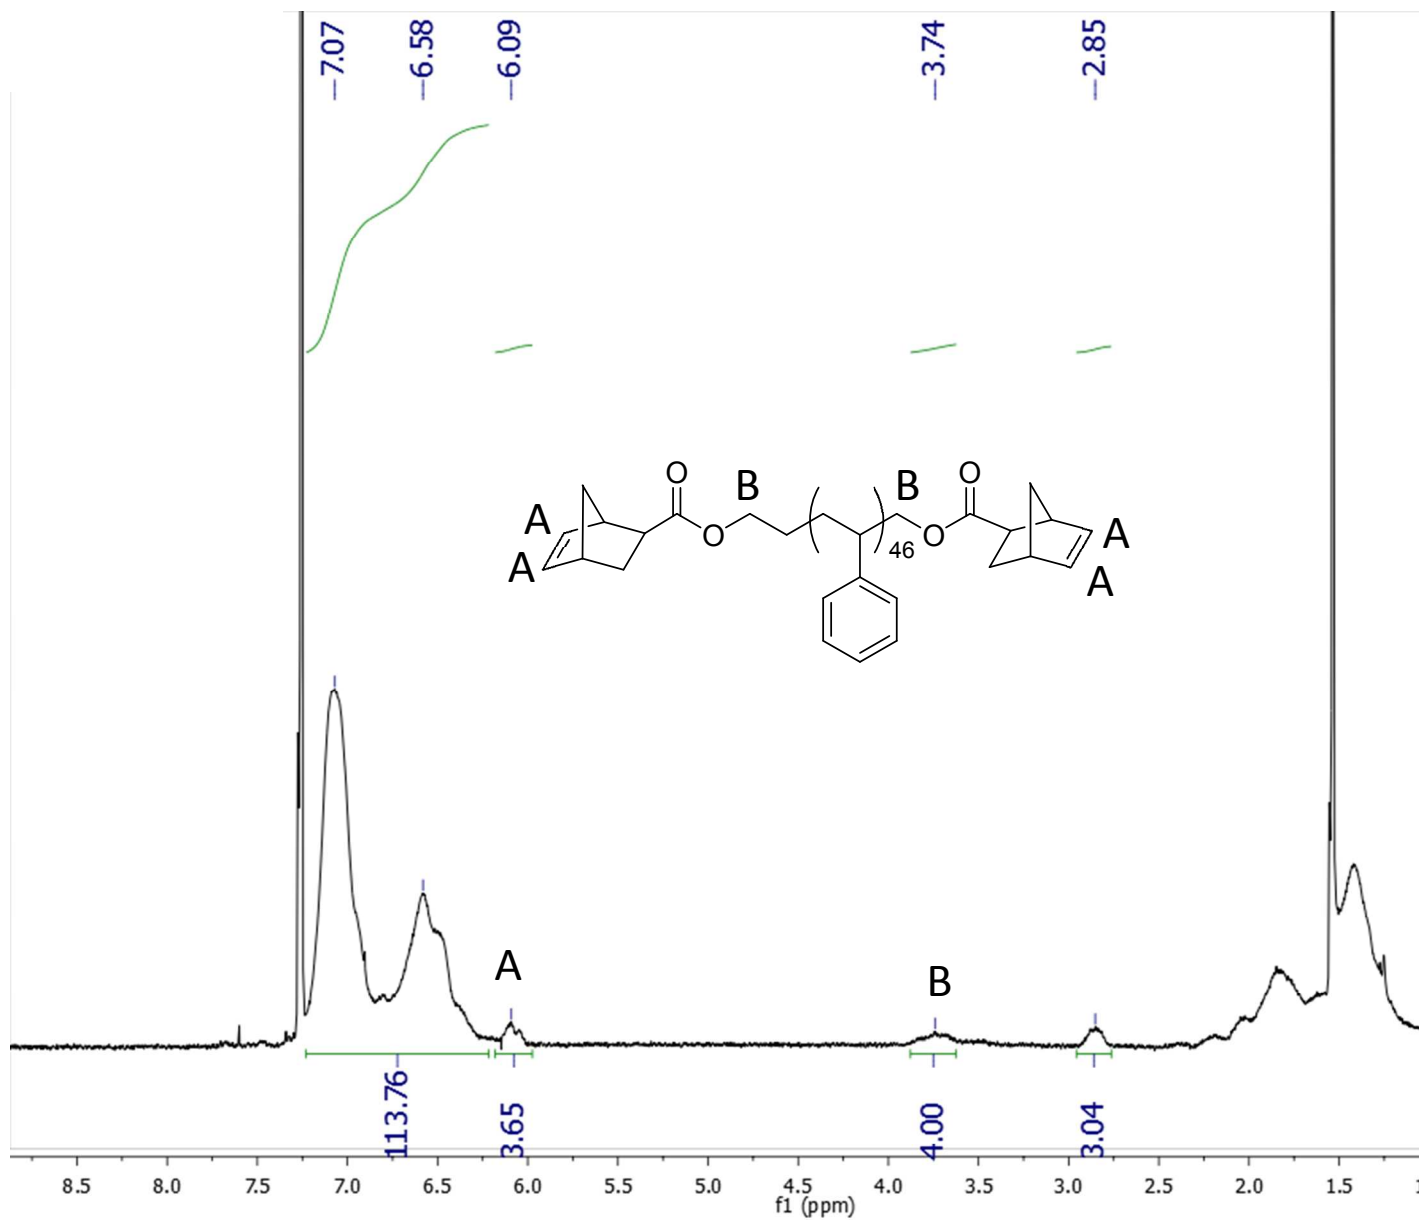

**Figure S1.** <sup>1</sup>H-NMR characterization of norbornene end-functionalized PS.

### Random Multiblock Synthesis (R2 and R3)

Norbornene-functionalized PEO (50.0 mg, 10.3  $\mu\text{mol}$ ), PS (50.0 mg, 9.92  $\mu\text{mol}$ ), and 1-8 octanedithiol (ODT) (3.77  $\mu\text{L}$ , 20.5  $\mu\text{mol}$ ) were dissolved in PI solution (0.372 mL, concentration of 5.37 mg/mL in THF) and THF (0.628 mL). An equimolar ratio between the

norbornene end groups on the polymer and the thiol functional groups was used. The concentration of the polymer in solution was 100 mg/mL. The amount of PI used was 2 weight % of the polymer starting material. The solid polymer was dissolved in the solution using a heat gun for several seconds. Nitrogen gas was bubbled through solution for 30 seconds. The solution was cured under UV light (wavelength=365 nm) for 1.5 hours. The solution was then precipitated in cyclohexane (10 mL) because did not dissolve the PEO and dissolved the PS slowly. Once stirred for several minutes, the solution was cooled in the -20 °C freezer for 30 minutes. The precipitated polymer was separated from the solvent using gravity filtration. The filter paper was left to dry in the hood and vacuum chamber overnight.

PDMS (31.1  $\mu$ L, 6.67  $\mu$ mol), PS (33.6 mg, 6.67  $\mu$ mol), norbornene-functionalized PEO (32.3 mg, 6.67  $\mu$ mol), and ODT (3.68  $\mu$ L, 20.0  $\mu$ mol) were dissolved in PI solution (0.357 mL, concentration of 5.37 mg/mL in THF), and THF (0.245 mL). The initial concentration of the polymer in solution was 100 mg/mL. The amount of PI used was 2 weight % of the polymer starting material. Nitrogen gas was bubbled through the solution for 30 seconds. The solution was cured under UV light (wavelength=365 nm) for 1.5 hours. The solution was then precipitated in methanol (10 mL) and stirred. The vial was placed on a rotary evaporator to remove excess solvent and left in the vacuum chamber to dry overnight at 80 °C.

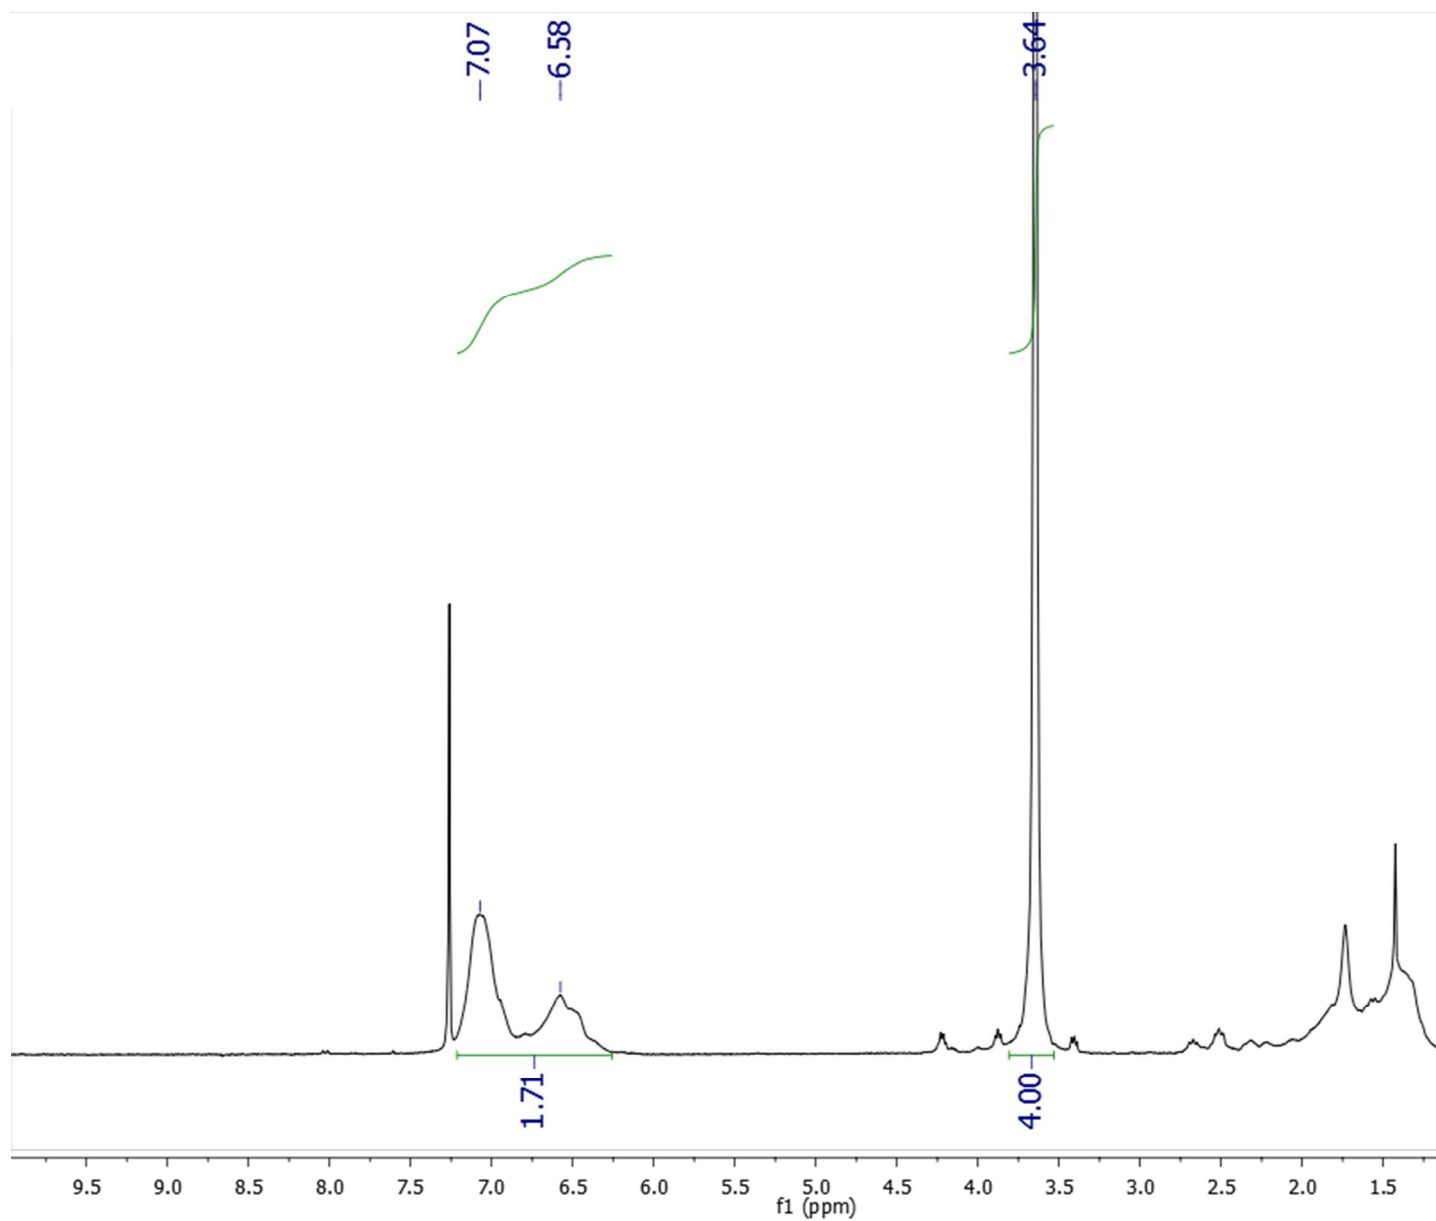

**Figure S2.**  $^1\text{H}$  NMR of multiblock copolymer R2 showing approximately equal incorporation of both homopolymers (55 wt% PEO, 45 wt % PS) and full conversion of norbornene end groups by the absence of the peak at 5.98 ppm.

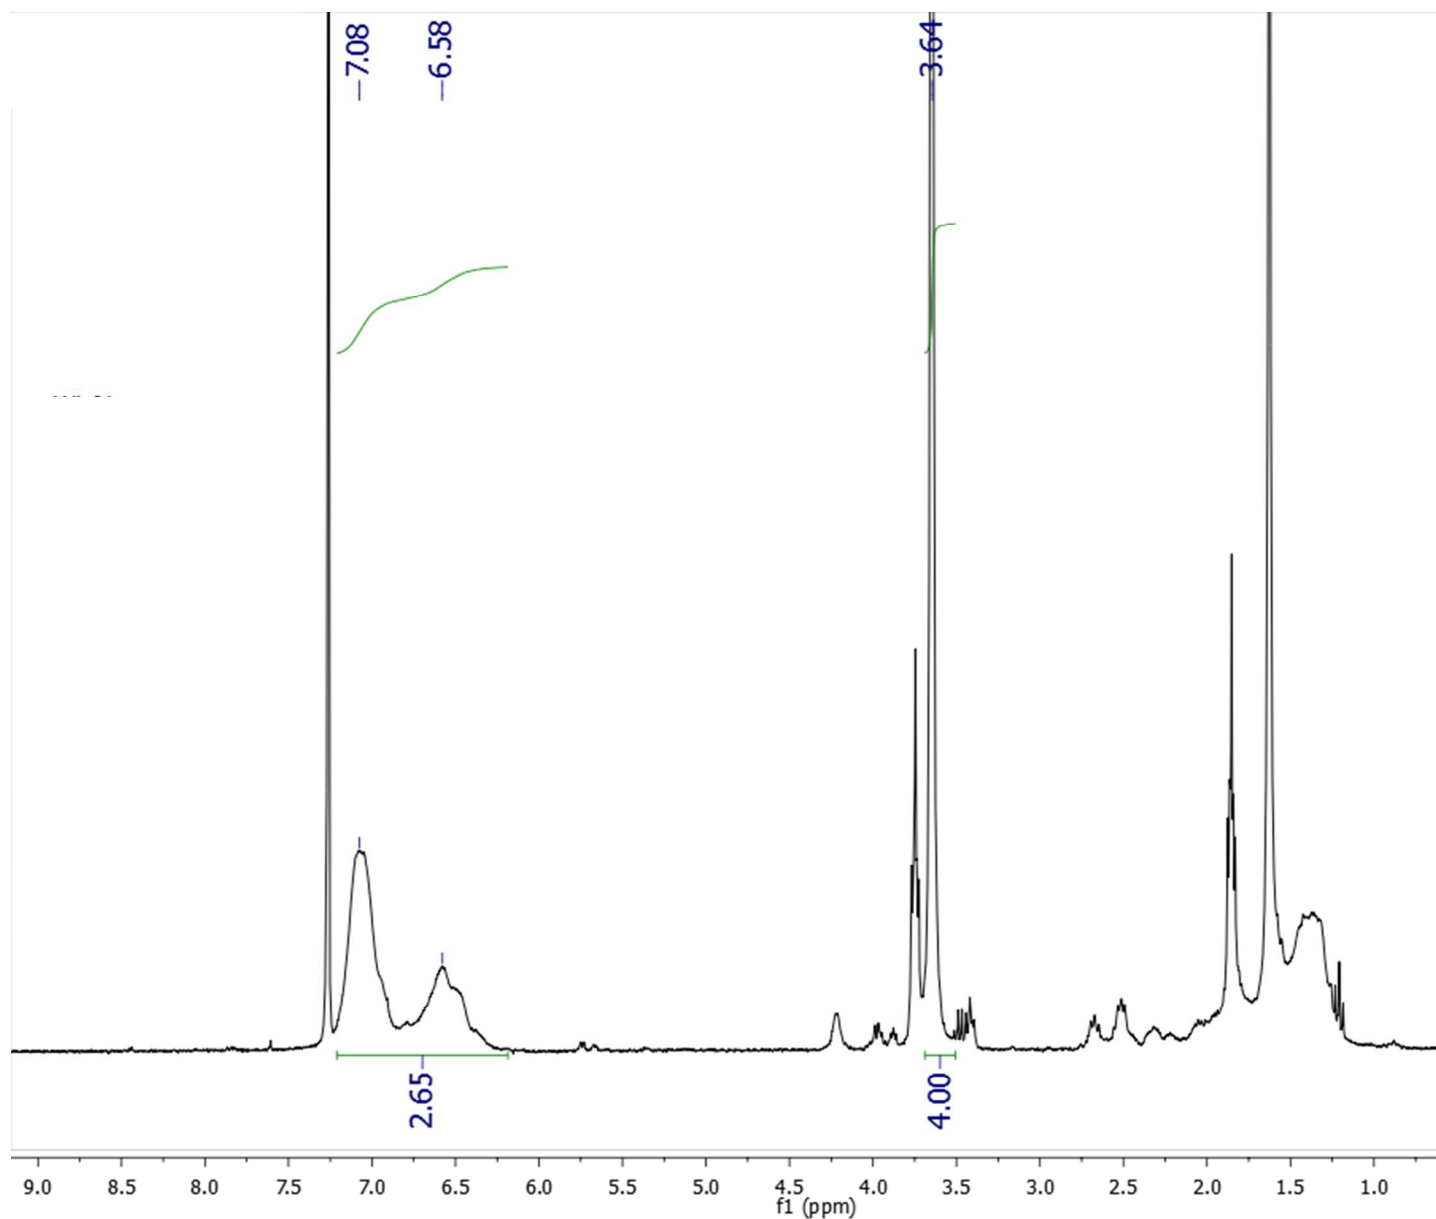

**Figure S3.**  $^1\text{H-NMR}$  of multiblock copolymer R3 showing incorporation of all homopolymer blocks (24 wt% PEO, 29 wt% PS and 47 wt% PDMS) and full conversion of norbornene end groups by the absence of a peak at 5.98 ppm.

#### **Alternating Multiblock Synthesis (A2)**

PS (100 mg, 19.8  $\mu\text{mol}$ ) and di-thiol PEO (67.5 mg, 19.9  $\mu\text{mol}$ ) were dissolved in PI solution (0.624 mL, concentration 5.37 mg/mL) and THF (1.05 mL) for a polymer concentration

of 100 mg/mL. The solution was degassed and stirred overnight under 365 nm UV exposure. The newly formed multiblock copolymer was then precipitated in diethyl ether, filtered and dried overnight under vacuum at 80 °C. Samples for  $^1\text{H}$  NMR and GPC were prepared in  $\text{CDCl}_3$  and THF, respectively. Thin films for AFM were prepared by spin coating a solution of 12 mg/mL multiblock copolymer in toluene at 2500 r.p.m. for one minute, followed by thermal annealing at 130 °C for 72 hours.

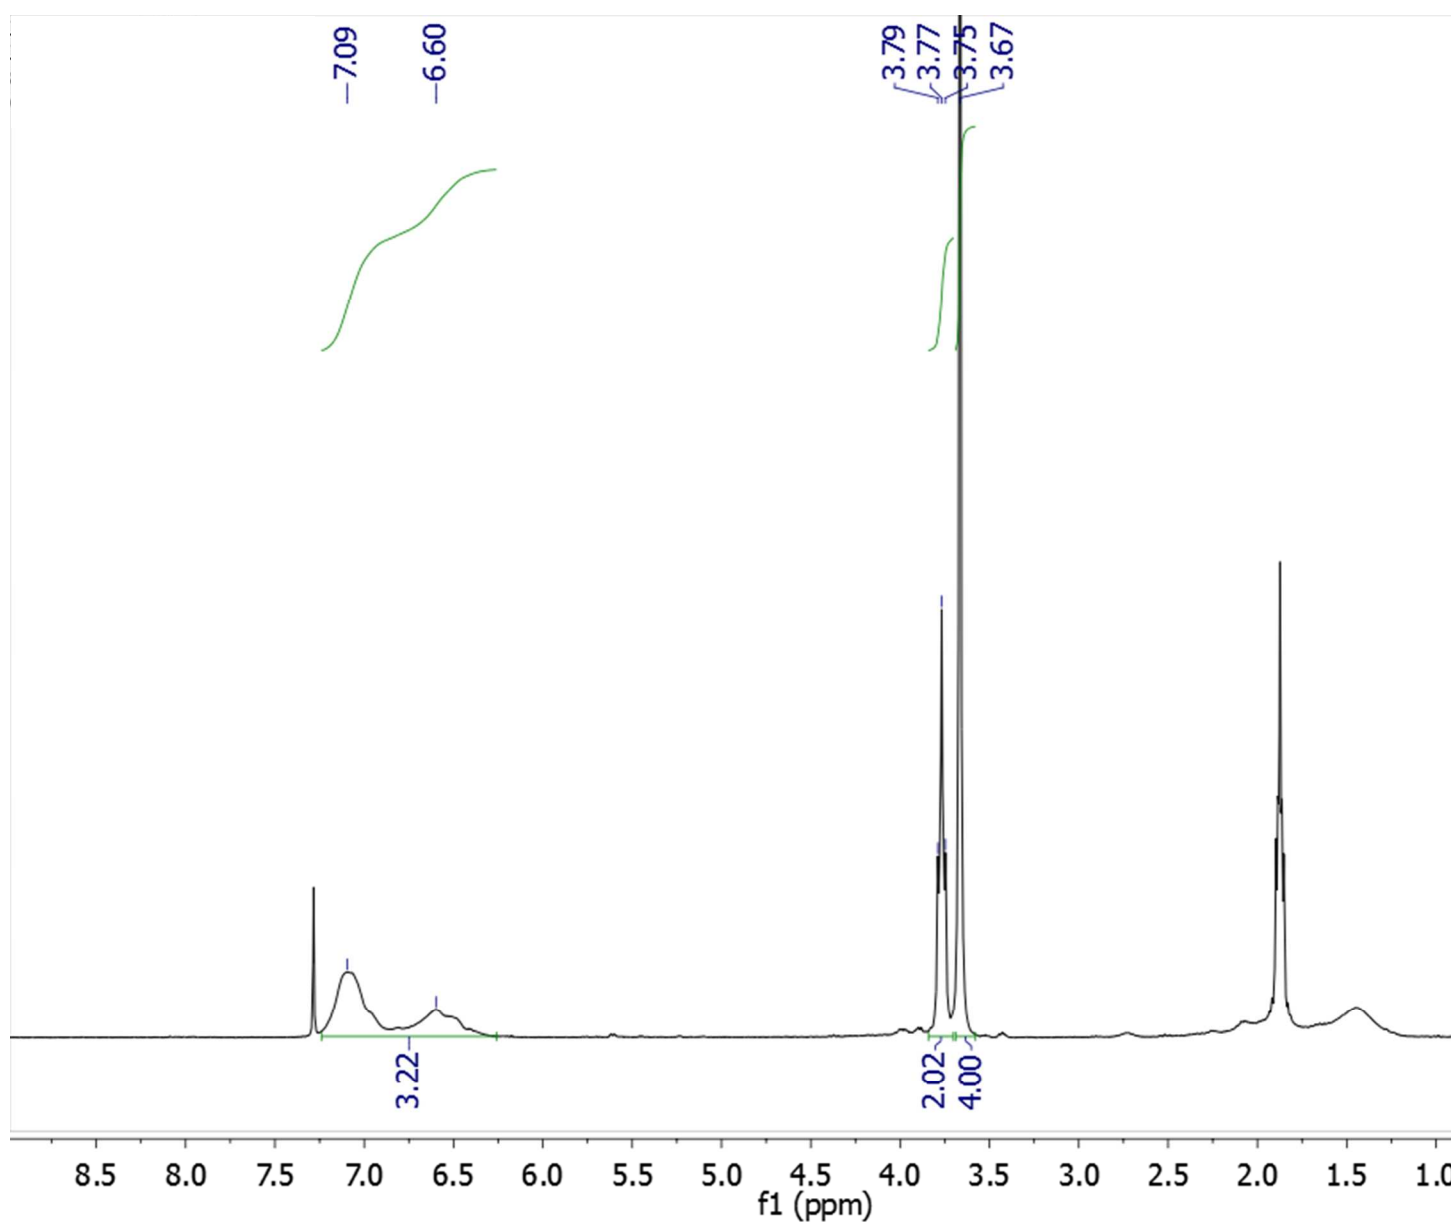



**Figure S4.**  $^1\text{H}$  NMR of multiblock copolymer A2 showing incorporation of both homopolymer blocks (40 wt% PEO and 60 wt% PS) and full conversion of norbornene end groups by the absence of a peak at 5.98 ppm.

## GPC

**Table S1.** Precursor Polymers. Values are taken from PS standards in THF.

| Homopolymer | $M_n$ (g/mol) | $\bar{D}$ |
|-------------|---------------|-----------|
| PEO         | 6800          | 1.03      |
| PS          | 8600          | 1.14      |
| PDMS        | 8900          | 1.24      |
| PEO-thiol   | 4500          | 1.04      |

**Table S2.** Multiblock Copolymers. Values are taken from PS standards in THF.

| Sample | $M_n$ (g/mol) | $\bar{D}$ | n (avg number of blocks) |
|--------|---------------|-----------|--------------------------|
| R2     | 29,700        | 1.7       | 3.7                      |
| R3     | 31,800        | 1.4       | 3.9                      |
| A2     | 29,300        | 1.6       | 4.5                      |

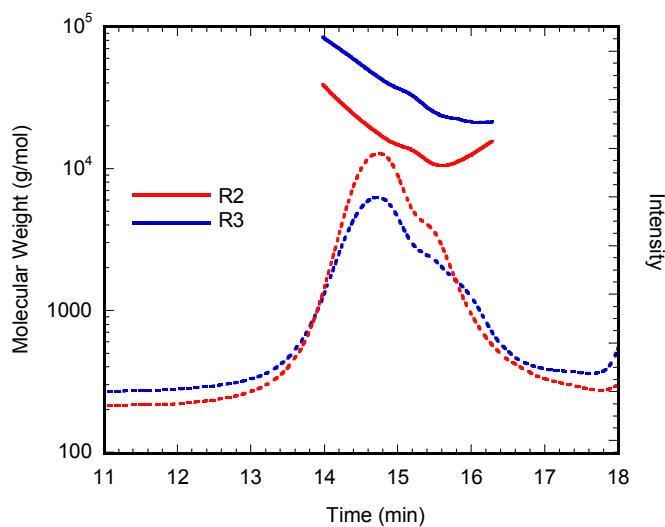

**Figure S5.** MALLS GPC of **R2** (red) and **R3** (blue). The dashed lines give the intensity of the refractive index detector while the solid lines give absolute molecular weight based on  $dn/dc$

calculated for each sample. **R2** has an  $M_n$  16,000 g/mol and an  $M_w$  of 18,000 g/mol while **R3** has an  $M_n$  of 35,000 g/mol and an  $M_w$  of 41,000 g/mol.

**Table S3.** Volume Fractions of Multiblock Copolymers. PEO density was assumed to be 1.13 g/mL, based on standard PEO crystallinity.

| Sample | %PS | %PEO | %PDMS |
|--------|-----|------|-------|
| R2     | 52% | 48%  | N/A   |
| R3     | 35% | 31%  | 34%   |
| A2     | 61% | 39%  | N/a   |

### Thermal Analysis

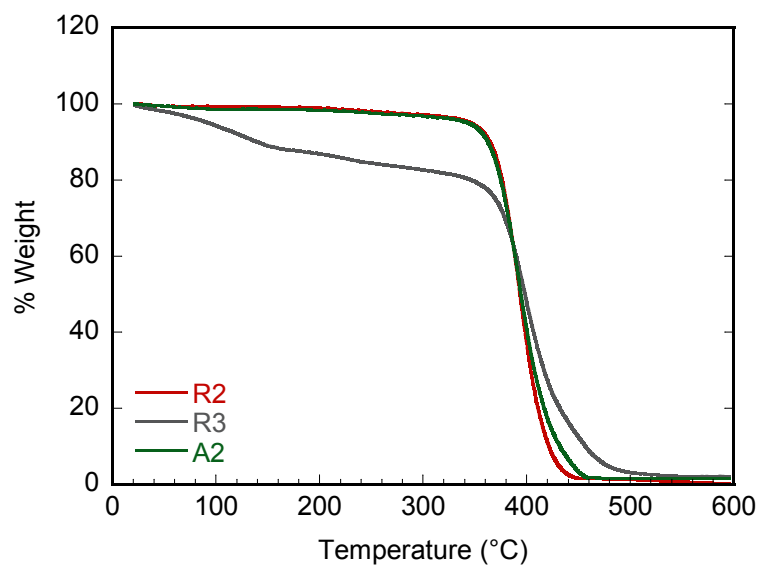

**Figure S6.** TGA of multiblock copolymers. **R2** and **A2** have high thermal stability which would allow for thermal annealing in the future.

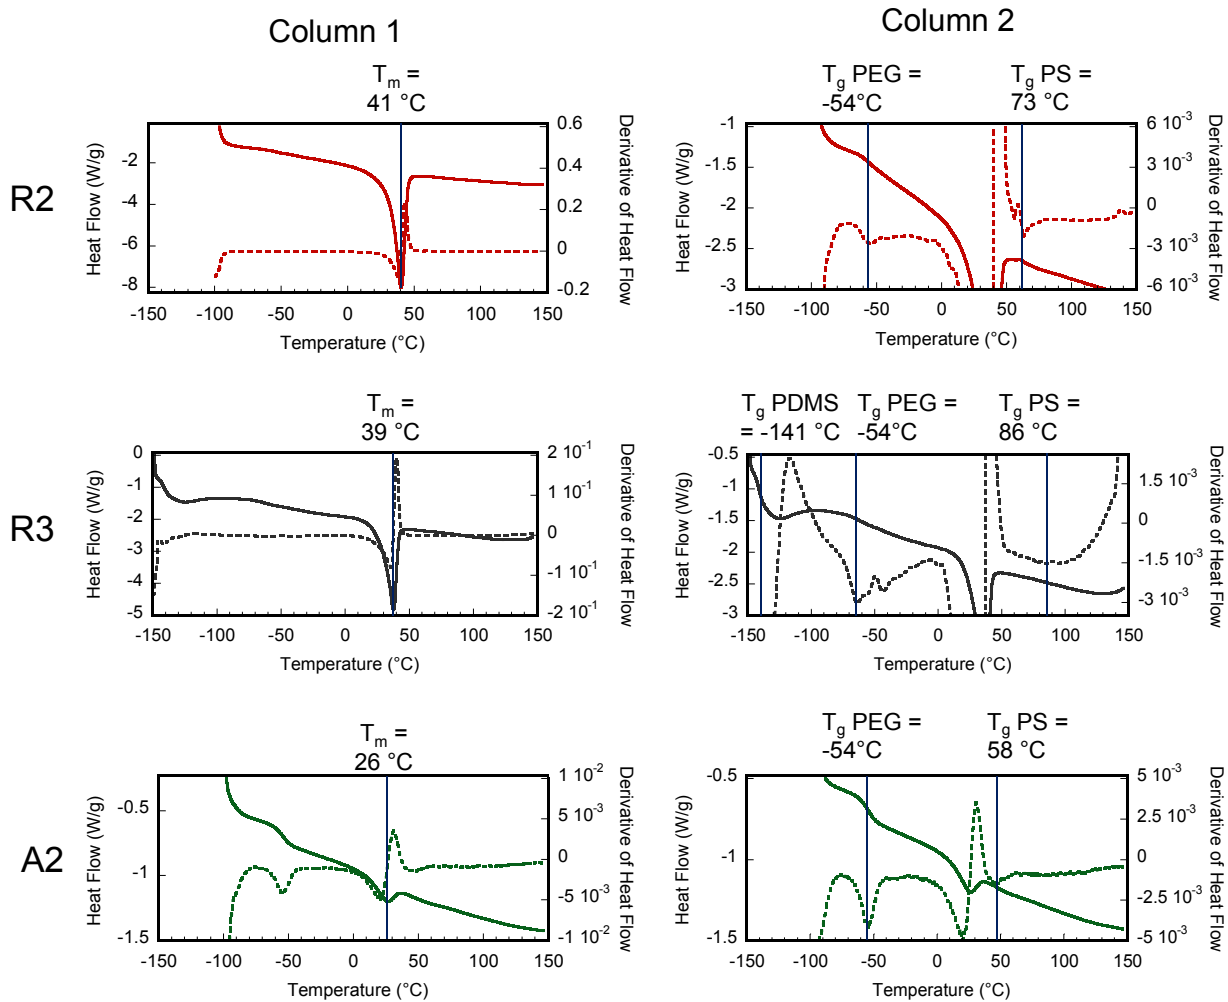

**Figure S7.** DSC traces for each of the multiblock copolymers. Column 1 shows heat flow vs temperature and the derivative of heat flow vs. temperature full scale while Column 2 expands the Y-axis for clarity.

**SAXS**

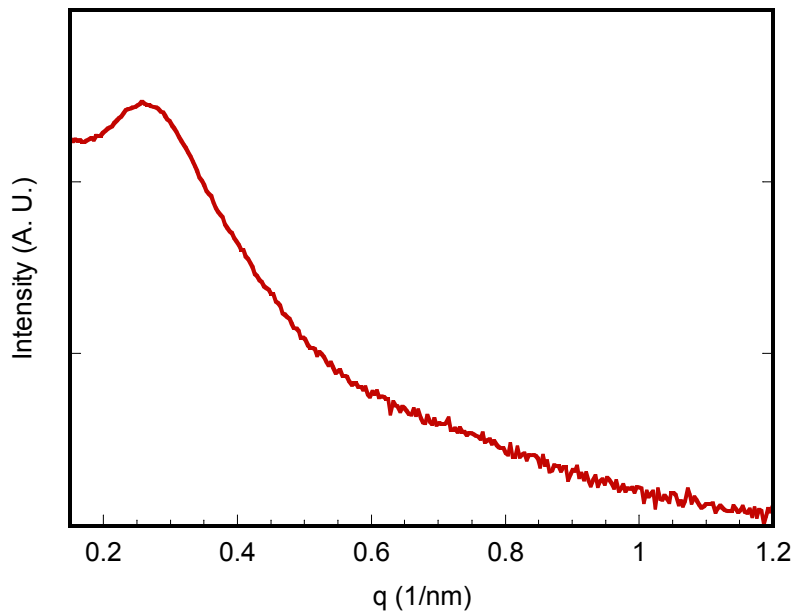

**Figure S8.** Small angle x-ray scattering from multiblock **R2**. The broad peak and absence of higher order peaks show that this sample is disordered. The domain spacing of 24 nm was found using  $d = 2\pi/q^*$ .
